# Supplementary material
Source: PubMed Central journal article supplement (PMC5777169)
Supplement: NIHMS927643-supplement-2.pdf [file NIHMS927643-supplement-2.pdf]

# Figure 1

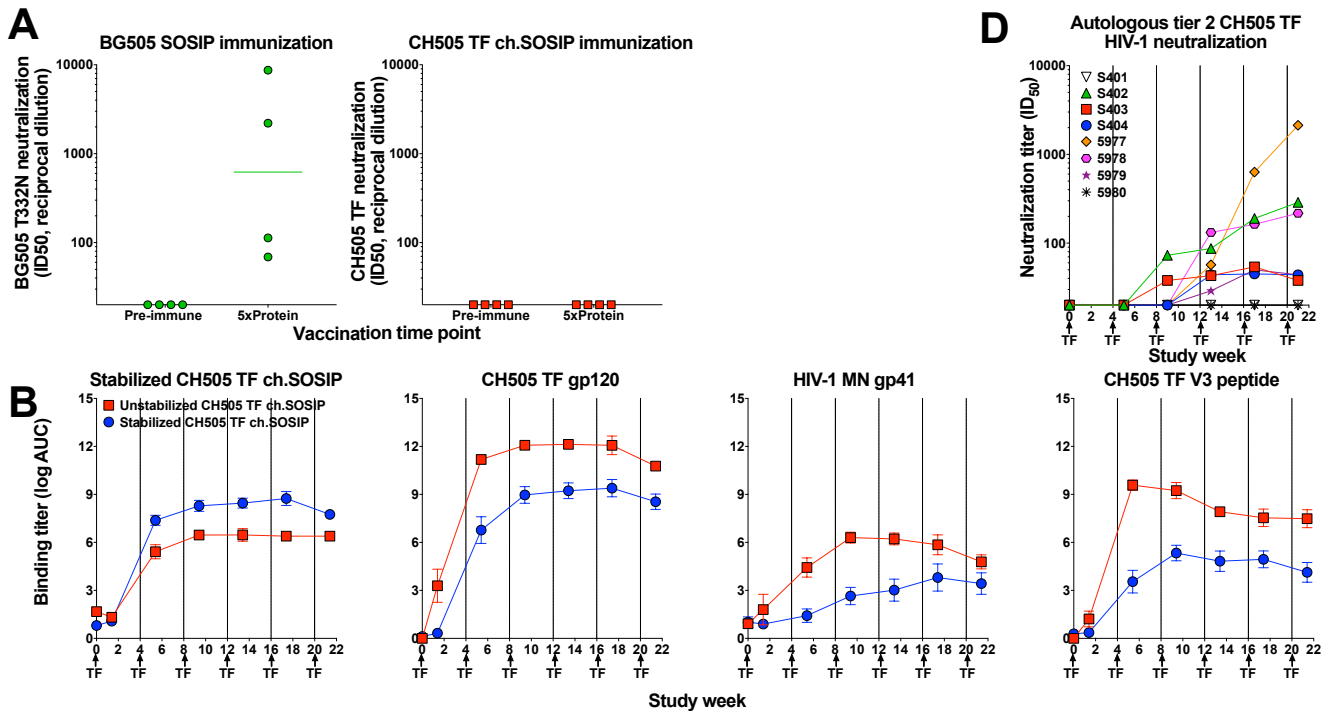

**C**

| Virus Name    | Tier | Week | Serum neutralization titers (ID50; reciprocal dilution) |      |      |      |      |                              |      |      |      |      |      |      |
|---------------|------|------|---------------------------------------------------------|------|------|------|------|------------------------------|------|------|------|------|------|------|
|               |      |      | Unstabilized CH505 TF ch.SOSIP                          |      |      |      |      | Stabilized CH505 TF ch.SOSIP |      |      |      |      |      |      |
|               |      |      | S413                                                    | S414 | S415 | S416 | S401 | S402                         | S403 | S404 | S977 | S978 | S979 | S980 |
| CH0505 TF     | 2    | 0    | <20                                                     | <20  | <20  | <20  | <20  | <20                          | <20  | <20  | <20  | <20  | <20  | <20  |
|               |      | 21   | <20                                                     | <20  | <20  | <20  | <20  | 273                          | 40   | 41   | 2128 | 217  | 44   | <20  |
| CH0505TF.gly4 | 2    | 0    | <20                                                     | <20  | <20  | <20  | <20  | <20                          | <20  | <20  | <20  | <20  | <20  | <20  |
|               |      | 21   | 25                                                      | <20  | 32   | 247  | 315  | 265                          | 118  | 403  | 366  | 264  | 155  | <20  |
| CH0505 w4.3   | 1B   | 0    | <20                                                     | <20  | <20  | <20  | <20  | <20                          | <20  | <20  | <20  | <20  | <20  | <20  |
|               |      | 21   | 5296                                                    | 1442 | 1004 | 2595 | 1132 | 2365                         | 701  | 626  | 4794 | 3477 | 818  | 2954 |
| SVA-MLV       | NA   | 0    | <20                                                     | <20  | <20  | <20  | <20  | <20                          | <20  | <20  | <20  | <20  | <20  | <20  |
|               |      | 21   | <20                                                     | <20  | <20  | <20  | <20  | <20                          | <20  | <20  | <20  | <20  | <20  | <20  |

**E**

| Virus Name | Tier | Week | Serum neutralization titers (ID50; reciprocal dilution) |      |      |      |      |                              |      |      |      |      |      |      |
|------------|------|------|---------------------------------------------------------|------|------|------|------|------------------------------|------|------|------|------|------|------|
|            |      |      | Unstabilized CH505 TF ch.SOSIP                          |      |      |      |      | Stabilized CH505 TF ch.SOSIP |      |      |      |      |      |      |
|            |      |      | S413                                                    | S414 | S415 | S416 | S401 | S402                         | S403 | S404 | S977 | S978 | S979 | S980 |
| TRO.11     | 2    | 0    | <20                                                     | <20  | <20  | <20  | <20  | <20                          | <20  | <20  | <20  | <20  | <20  | <20  |
|            |      | 21   | <20                                                     | <20  | <20  | <20  | <20  | <20                          | 109  | <20  | <20  | <20  | <20  | <20  |
| SC422661   | 2    | 0    | <20                                                     | <20  | <20  | <20  | <20  | <20                          | <20  | <20  | <20  | <20  | <20  | <20  |
|            |      | 21   | <20                                                     | <20  | <20  | <20  | <20  | <20                          | 145  | <20  | <20  | <20  | <20  | <20  |
| CNE55      | 2    | 0    | <20                                                     | <20  | <20  | <20  | <20  | <20                          | <20  | <20  | <20  | <20  | <20  | <20  |
|            |      | 21   | <20                                                     | <20  | <20  | <20  | <20  | <20                          | 79   | <20  | <20  | <20  | <20  | <20  |
| Ce1176_A3  | 2    | 0    | <20                                                     | <20  | <20  | <20  | <20  | <20                          | <20  | <20  | <20  | <20  | <20  | <20  |
|            |      | 21   | <20                                                     | <20  | <20  | <20  | <20  | <20                          | 488  | <20  | <20  | 79   | <20  | <20  |
| SVA-MLV    | NA   | 0    | <20                                                     | <20  | <20  | <20  | <20  | <20                          | <20  | <20  | <20  | <20  | <20  | <20  |
|            |      | 21   | <20                                                     | <20  | <20  | <20  | <20  | <20                          | <20  | <20  | <20  | <20  | <20  | <20  |

**F**

| Serum neutralization titers (ID50; reciprocal dilution) |      |      |      |
|---------------------------------------------------------|------|------|------|
| Virus Name                                              | Tier | Week | S402 |
| 398-F1_F6_20                                            | 2    | 0    | <20  |
|                                                         |      | 21   | 63   |
| X2278-C2-B6                                             | 2    | 0    | <20  |
|                                                         |      | 21   | 621  |
| 246-F3_C10_2                                            | 2    | 0    | <20  |
|                                                         |      | 21   | 47   |
| CH119.10                                                | 2    | 0    | <20  |
|                                                         |      | 21   | 33   |
| BJOX002000.03.2                                         | 2    | 0    | <20  |
|                                                         |      | 21   | 54   |
| 25710-2.43                                              | 2    | 0    | <20  |
|                                                         |      | 21   | 456  |
| X1632-S2-B10                                            | 2    | 0    | <20  |
|                                                         |      | 21   | 27   |
| Ce703010217_B6                                          | 2    | 0    | <20  |
|                                                         |      | 21   | <20  |
| Ce1176_A3                                               | 2    | 0    | <20  |
|                                                         |      | 21   | 659  |
| TRO.11                                                  | 2    | 0    | <20  |
|                                                         |      | 21   | 109  |
| SC422661                                                | 2    | 0    | <20  |
|                                                         |      | 21   | 145  |
| CNE55                                                   | 2    | 0    | <20  |
|                                                         |      | 21   | 73   |
| SVA-MLV                                                 | NA   | 0    | <20  |
|                                                         |      | 21   | <20  |

**G**

| 5977 and 5978 serum neutralization titers (ID50) |                      |      |      |
|--------------------------------------------------|----------------------|------|------|
| Virus                                            | Epitope              | 5977 | 5978 |
| CH0505 TF                                        | WT                   | 3008 | 232  |
| CH0505 TF N160A                                  | V1V2 glycan          | 1398 | 37   |
| CH0505 TF N276Q                                  | CD4bs                | <30  | <30  |
| CH0505 TF.gly4                                   | CD4bs                | 411  | 311  |
| CH0505 TF.gly4 N280D                             | CD4bs                | 536  | 337  |
| CH0505 TF S365P                                  | CD4bs                | 6940 | 964  |
| CH0505 TF G458Y                                  | CD4bs                | 6565 | 1045 |
| CH0505 TF N279Q                                  | CD4bs                | 5481 | 527  |
| CH0505 TF N279K                                  | CD4bs                | 4803 | 262  |
| CH0505 TF N301A                                  | V3 glycan            | 1954 | 497  |
| CH0505 TF N334A                                  | V3 glycan            | 3787 | 232  |
| CH0505 TF N611A                                  | gp120-gp41 interface | 3337 | 205  |
| CH0505 TF N88A                                   | Fusion peptide       | 2186 | 412  |

**H**

| S402 wk21 serum neutralization titers (ID50) |                |      |
|----------------------------------------------|----------------|------|
| Virus                                        | Epitope        | S402 |
| TRO.11                                       | WT             | 160  |
| TRO.11 N279A                                 | CD4bs          | 253  |
| TRO.11 N280D                                 | CD4bs          | 169  |
| TRO.11 G458Y                                 | CD4bs          | 76   |
| TRO.11 N160K                                 | V1V2 glycan    | 118  |
| TRO.11 N295V                                 | V3 glycan      | 59   |
| TRO.11 N332A                                 | V3 glycan      | 49   |
| TRO.11 N625A                                 | MPER           | 111  |
| TRO.11 N88A                                  | Fusion peptide | 198  |
| SVA-MLV                                      | NA             | <20  |
