# Supplementary material
Source: PubMed Central journal article supplement (PMC5777169)

# Figure 2

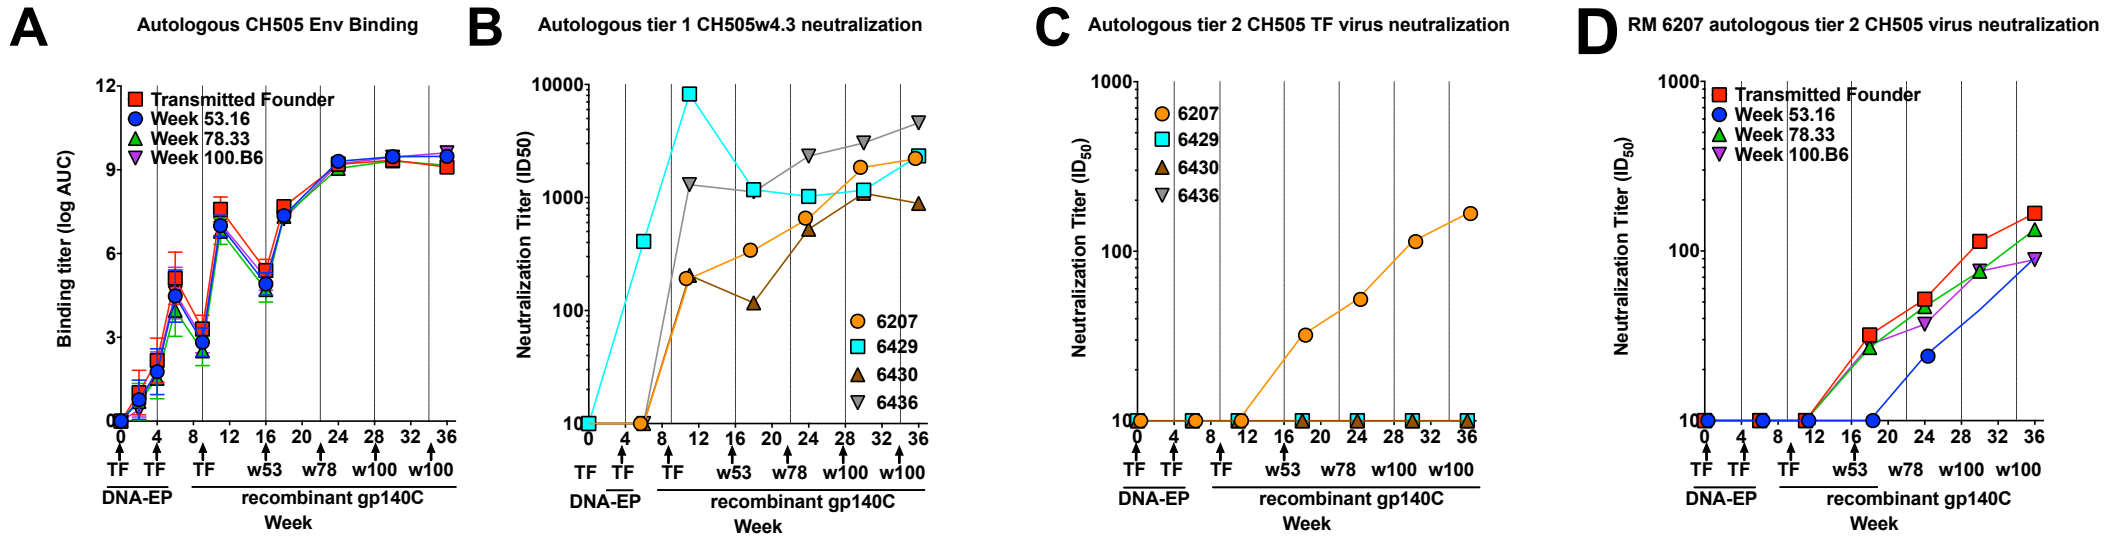

### E Plasma neutralization titer (ID50; reciprocal dilution)

| Macaque ID | SVA-MLV | 398-F1-F6_20 | 25710-2.43 | CNE8   | TRO.11 | X2278_C2_B6 | BJOX002000.03.2 | X1632_S2_B10 | Ce1176_A3 | 246-F3_C10_2 | CH119.10 | Ce703010217_B6 | CNE55  | SC422661.8 | Q842.d12 | JR-FL  | REJO4541.67 |        |
|------------|---------|--------------|------------|--------|--------|-------------|-----------------|--------------|-----------|--------------|----------|----------------|--------|------------|----------|--------|-------------|--------|
| 6207       | NA      | Tier 2       | Tier 2     | Tier 2 | Tier 2 | Tier 2      | Tier 2          | Tier 2       | Tier 2    | Tier 2       | Tier 2   | Tier 2         | Tier 2 | Tier 2     | Tier 2   | Tier 2 | Tier 2      | Tier 2 |
|            | <20     | 27           | 23         | 43     | 159    | <20         | 21              | <20          | 29        | <20          | 21       | <20            | 193    | 169        | <20      | <20    | <20         |        |

### G Plasma neutralization titer (ID50; reciprocal dilution)

| Macaque ID | Study week | TRO.11 | TRO.11 N160K | TRO.11 N160K Y173A | CH0505 TF | CH0505 TF N160A | CH0505 TF N160A N173A | CNE55  | CNE55 N160K |
|------------|------------|--------|--------------|--------------------|-----------|-----------------|-----------------------|--------|-------------|
|            |            | Tier 2 | Tier 2       | Tier 2             | Tier 2    | Tier 2          | Tier 2                | Tier 2 | Tier 2      |
| 6207       | 30         | 149    | 32           | <20                | 126       | 44              | <20                   | 66     | <20         |
|            | 36         | 129    | 70           | <20                | 112       | 59              | <20                   | 66     | <20         |

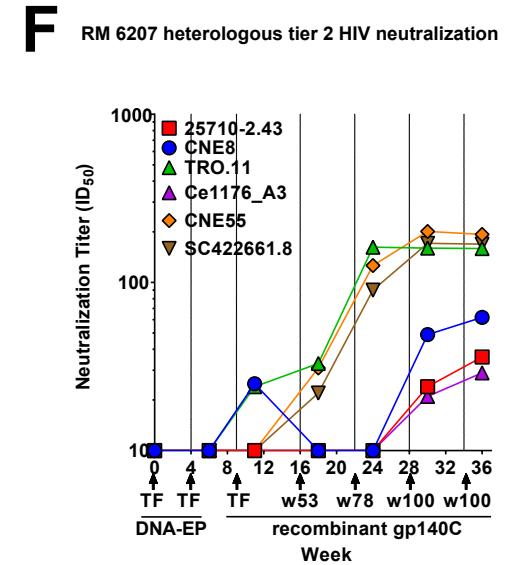

Supplement: NIHMS927643-supplement-3.pdf [file NIHMS927643-supplement-3.pdf]
