# Supplementary material
Source: PubMed Central journal article supplement (PMC5777169)

# Figure 3

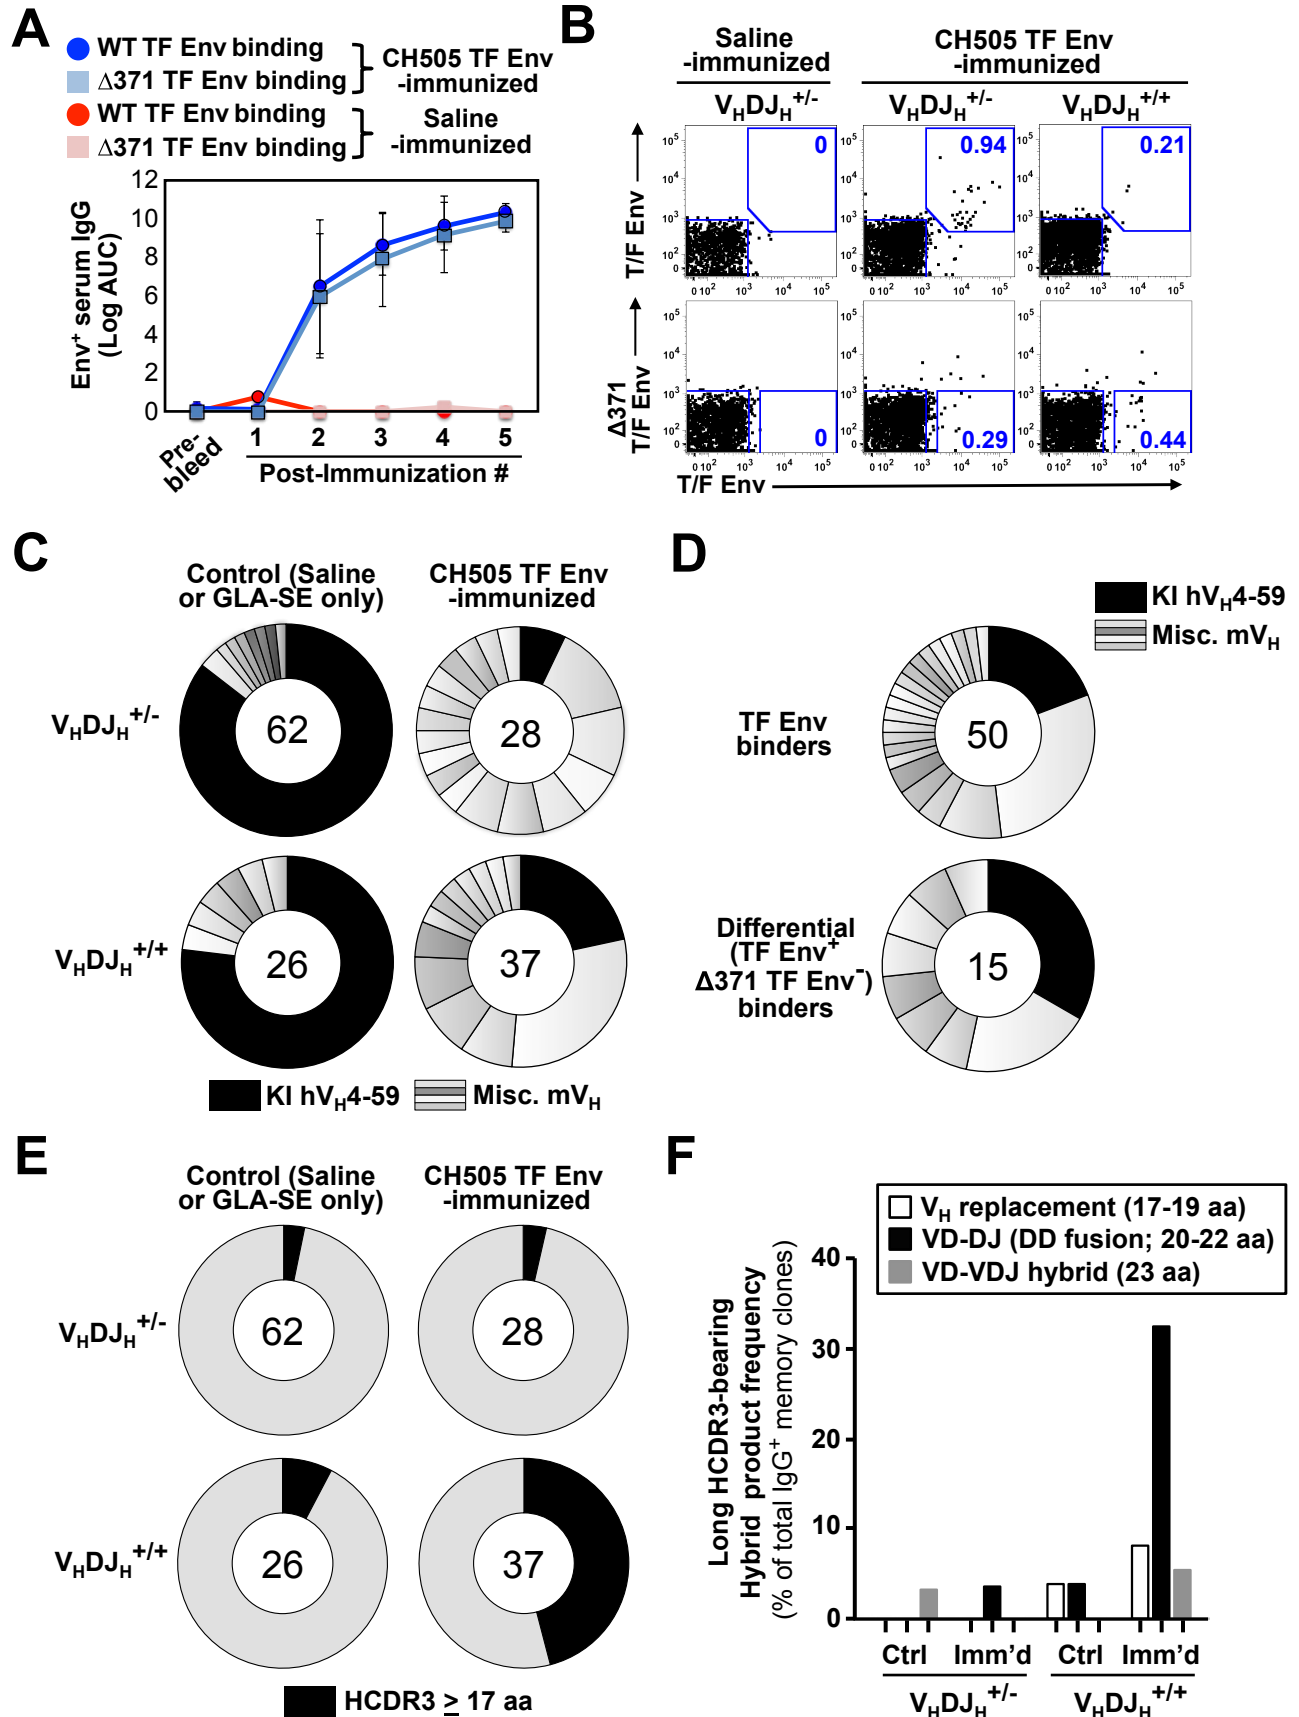

Supplement: NIHMS927643-supplement-4.pdf [file NIHMS927643-supplement-4.pdf]
